# Supplementary material
Source: PubMed Central journal article supplement (PMC3176918)
Supplement: NIHMS318159-supplement-01.pdf [file NIHMS318159-supplement-01.pdf]

### Supplementary Figure 1

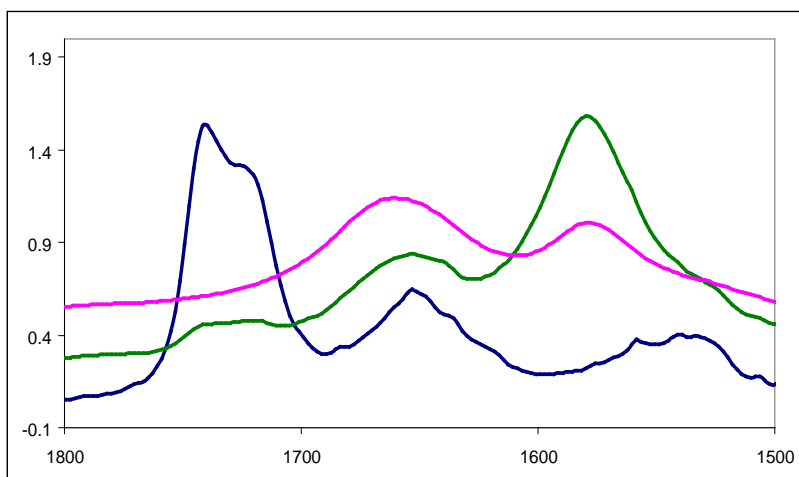

FT-IR spectra for the unpurified dendrimer **8** (blue trace), unpurified dendrimer **9** (green trace), and purified dendrimer **9** (purple trace). The spectra show the disappearance of the signal corresponding to the carbonyl of the ester group and the appearance of a signal corresponding to the carbonyl of the acid group, while the signal corresponding to the amide carbonyl remains constant. Further, after purification, the removal of excess acrylate is observed with the decrease in the acid carbonyl signal relative to the signal for the amide carbonyl.
